# The roles of aryl hydrocarbon receptor in immune responses

Nam Trung Nguyen\*, Hamza Hanieh\*, Taisuke Nakahama\* and Tadimitsu Kishimoto

Laboratory of Immune Regulation, WPI-Immunology Frontier Research Center, Osaka University, 3-1 Yamada-oka, Suita, Osaka 565-0871, Japan

Correspondence to: T. Kishimoto; E-mail: [kishimoto@ifrec.osaka-u.ac.jp](mailto:kishimoto@ifrec.osaka-u.ac.jp)

\*These authors contributed equally to this article.

Received 4 July 2012, accepted 27 February 2013

## Abstract

**A number of recent studies have examined the functions of aryl hydrocarbon receptor (Ahr) in the immune system. Also known as dioxin receptor, Ahr is a ligand-activated transcription factor that serves as a receptor for various environmental toxins. The functions of Ahr in T cells depend on the specific ligand bound to the receptor. For instance, binding of 2,3,7,8-tetrachlorodibenzo-*p*-dioxin to Ahr suppresses experimental autoimmune encephalomyelitis (EAE) by promoting the development of Foxp3<sup>+</sup> T<sub>reg</sub> cells, whereas 6-formylindolo[3,2-*b*]carbazole enhances EAE by inducing the differentiation of IL-17-producing T cells. Furthermore, specifically deleting Ahr in T cells inhibits collagen-induced arthritis in mice. In macrophages and dendritic cells (DCs), Ahr is anti-inflammatory. In response to LPS, Ahr-deficient macrophages show increased production of pro-inflammatory cytokines, such as IL-6 and TNF- $\alpha$ , and Ahr-deficient DCs produce less of the anti-inflammatory cytokine IL-10. In this review, we discuss the roles of Ahr in macrophages and T cells. Moreover, studies examining Ahr activation in other cell types have revealed additional contributions to B cell and osteoblast/osteoclast differentiation. We also briefly summarize the current understanding of regulatory mechanisms underlying Ahr activation in various cells and discuss the potential clinical implications of cell-specific targeting of Ahr in pathologic conditions of the immune system.**

*Keywords:* dioxin receptor, immune regulation

## Introduction

Aryl hydrocarbon receptor (Ahr) is a ligand-activated transcription factor that mediates numerous cellular responses to toxins and plays critical modulatory roles in various immune cells during innate and adaptive immune responses. Ahr was originally investigated as a receptor for environmental contaminants, such as 2,3,7,8-tetrachlorodibenzo-*p*-dioxin (TCDD). More recently, studies have examined Ahr in immune cells including T cells and antigen-presenting cells including dendritic cells (DCs) and macrophages. The balance between T<sub>H</sub>17 cells and the other T-cell subsets is particularly critical to ensure that a specific T-cell subset does not predominate and—together with other transcriptional changes—cause disorders associated with aberrant cytokine production.

One approach has been to specifically delete Ahr in macrophages or T cells. Mice lacking Ahr in macrophages or T cells are used as models of inflammatory and autoimmune diseases, including LPS-induced shock and collagen-induced arthritis (CIA). In addition, Ahr has been investigated in experimental autoimmune encephalomyelitis (EAE) and dextran sulfate sodium (DSS)-induced colitis, among other disease

models. In this review, we discuss the roles of Ahr in immune and non-immune cells, including contributions to various animal models of disease. Importantly, the signaling cascades and biochemical processes associated with Ahr are promising avenues to modulate immune responses in the clinic.

## Ahr signaling pathways

Ahr is a ligand-activated member of the Per-Arnt-Sim family of basic helix–loop–helix transcription factors. Normally, Ahr forms cytoplasmic complexes with various proteins, such as heat shock protein 90, Ahr-interacting protein and p23 (1–3). Binding of Ahr to a xenobiotic ligand, such as TCDD, induces translocation of the Ahr complex into the nucleus, where it binds Ahr nuclear translocator (Arnt). In the nucleus, Ahr–Arnt heterodimers bind xenobiotic-responsive elements (XREs) in the promoters of responsive genes, including those encoding members of the cytochrome P450 family (4–7). Ahr repressor—a marker of Ahr activation—attenuates Ahr signaling (8).

Ahr is involved in cell proliferation, differentiation and cytokine secretion. Furthermore, several inflammatory response-related genes contain multiple potential XRE boxes in upstream sequences (9). It is likely that the different distributions of XREs contribute to the transcriptional regulation of various immune activities following Ahr activation. Yet, few studies have examined the precise roles of Ahr and XREs in these processes. Of note, the Ahr reportedly serves not only as a transcription factor but also as part of a ligand-dependent E3-type ubiquitin ligase complex to regulate selective protein degradation. Protein ubiquitination involves a ubiquitin-activating enzyme (E1), ubiquitin-conjugating enzyme (E2) and ubiquitin protein ligase (E3), which acts as a bridge between E2 and the substrate (10, 11). Ohtake *et al.* (10, 11) found that Ahr activation by such ligands as 3-methylcholanthrene (3MC) and  $\beta$ -naphthoflavone decreased protein levels of endogenous estrogen receptor (ER) $\alpha$ , ER $\beta$  and androgen receptor (AR). Ligand-bound Ahr assembles into the CUL4B-based atypical E3 ubiquitin ligase complex CUL4BAhr, which includes CUL4B, DNA-binding protein 1, Rbx1, subunits of the 19S regulatory particle of the 26S proteasome, Arnt and transducin  $\beta$ -like 3 (10, 11). Ahr has E3 ubiquitin ligase activity both *in vitro* and *in vivo* (11). For instance, reconstituted *in vitro* ubiquitination assays have shown that the E3 ubiquitin ligase activity of CUL4BAhr for ER $\alpha$  is dependent on 3MC and not on E2 (10, 11). On the other hand, degradation of ER $\alpha$  or AR in the uterus and prostate can be induced by Ahr activation but is not observed in Ahr-deficient (Ahr<sup>-/-</sup>) mice (12, 13). In addition, following activation of TLRs, Ahr interacts with proteins involved in NF- $\kappa$ B signaling. Ahr activation also leads to proto-oncogene expression via 'cross-talk' with the p38 MAPK signaling pathway (14). For example, Ahr activates p38-MAPK signaling to regulate the expression of *c-jun*, which encodes an AP-1 subunit, by the Ahr ligand TCDD (14).

Ahr is activated in immune and/or cancer cells by many exogenous xenobiotic ligands, including TCDD, 3MC, benzo[a]pyrene (BaP), and such endogenous ligands as 6-formylindolo[3,2-b]carbazole (FICZ), Kynurenine (Kyn) and 2-(1H-indole-3-carbonyl)-thiazole-4-carboxylic acid methyl ester (ITE) (15–18). Receptor affinity and the degree of activation likely reflect the planarity, aromaticity and hydrophobicity of the ligand (15).

### Ahr in T cells and autoimmune diseases

Three separate laboratories reported that Ahr regulates the differentiation of IL-17-producing T (T<sub>h</sub>17) and T<sub>reg</sub> cells (19–21). Using DNA microarrays, Kimura *et al.* (19) showed that Ahr is expressed under T<sub>h</sub>17 cell-polarizing conditions characterized by IL-6 and TGF- $\beta$  but not in response to either cytokine alone. IL-6 inhibits TGF- $\beta$ -induced Foxp3<sup>+</sup> T<sub>reg</sub> cell differentiation and initiates T<sub>h</sub>17 cell development; these effects shift the balance between T<sub>h</sub>17 and T<sub>reg</sub> cells and contribute to the pathogenesis of several animal models of autoimmune diseases, including EAE and CIA (19–24). Ahr<sup>-/-</sup> naive T cells exposed to IL-6 and TGF- $\beta$  *in vitro* fail to differentiate into T<sub>h</sub>17 cells owing to a lack of inhibitory interactions between Ahr and negative regulators of T<sub>h</sub>17 cell differentiation (e.g. Stat1 and Stat5) and/or binding of Ahr to the IL-17 promoter (19, 25, 26). An overview of Ahr in T<sub>h</sub>17, T<sub>reg</sub> and type 1 T regulatory (T<sub>r</sub>1) cell development can be found in Figs 1 and 2.

Results from several studies on the role of Ahr in experimental autoimmune diseases have been summarized in Table 1. These results, however, do not entirely agree perhaps owing to differences in the examined ligands, cell types and/or regulatory signaling pathways. TCDD and FICZ promote T<sub>reg</sub> and T<sub>h</sub>17 cell differentiation *in vitro* (19). Veldhoen *et al.* (20) demonstrated that activating Ahr with FICZ enhances T<sub>h</sub>17 cell development and promotes the development of EAE. On the other hand, Quintana *et al.* (21) reported that the effects of Ahr on T<sub>reg</sub> and T<sub>h</sub>17 cell differentiation are ligand specific; FICZ and TCDD

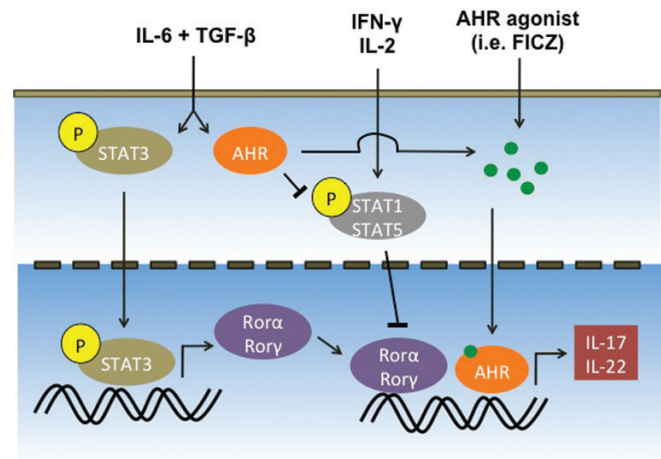

**Fig. 1.** Ahr and T<sub>h</sub>17 cell development. T<sub>h</sub>17 cell differentiation is induced by IL-6 and TGF- $\beta$ . These cytokines trigger STAT3 phosphorylation, which in turn induces the expression of the T<sub>h</sub>17 cell-specific transcription factors Rora and Rory followed by IL-17 and IL-22 expression. Ahr is also expressed in response to IL-6 and TGF- $\beta$  and participates in T<sub>h</sub>17 cell differentiation. Ahr plays different roles in T<sub>h</sub>17 cell generation including inhibiting STAT1 and STAT5 phosphorylation and directly binding the IL-17 promoter (19, 25, 26).

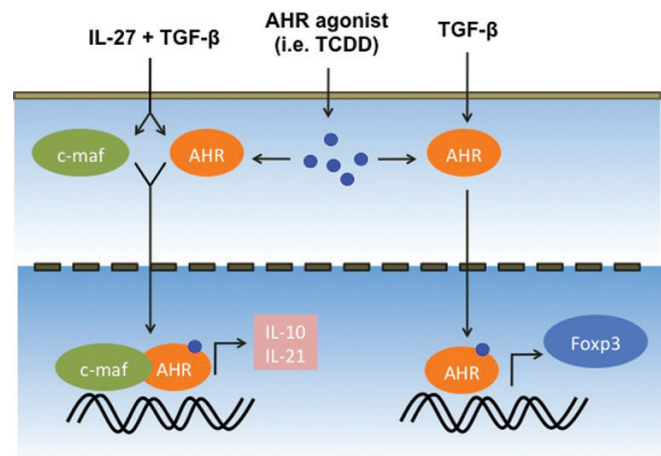

**Fig. 2.** Ahr and T<sub>r</sub>1 and T<sub>reg</sub> cell generation. T<sub>r</sub>1 or T<sub>reg</sub> cells develop in response to IL-27 and TGF- $\beta$ , or TGF- $\beta$  alone. T<sub>reg</sub> cell-polarizing conditions trigger the expression of transcription factors, including Ahr and c-maf, and Ahr-c-maf complexes bind to the IL-10 and IL-21 promoter regions. Ahr also directly interacts with the Foxp3 promoter under T<sub>reg</sub> cell-polarizing conditions (21, 27).

**Table 1.** Effects of Ahr in experimental models of autoimmune disorders

| Experimental model | Ahr status           | Effects in immune cell populations                                      | Effects on disease  | References |
|--------------------|----------------------|-------------------------------------------------------------------------|---------------------|------------|
| EAE                | Activated by TCDD    | More T <sub>reg</sub> cells<br>Fewer T <sub>h</sub> 17 cells            | Suppresses disease  | 21         |
|                    | Activated by FICZ    | Fewer T <sub>reg</sub> cells<br>Fewer T <sub>h</sub> 17 cells           | Exacerbates disease | 20, 21     |
|                    | Activated by ITE     | More tolerogenic DCs<br>More T <sub>reg</sub> cells                     | Suppresses disease  | 29         |
| CIA<br>Colitis     | Deleted from T cells | Fewer T <sub>h</sub> 17 cells                                           | Suppresses disease  | 30         |
|                    | Activated by FICZ    | Fewer IFN- $\gamma$ <sup>+</sup> cells<br>More IL-17 <sup>+</sup> cells | Suppresses disease  | 38         |

promote and inhibit EAE development, respectively. Differences in the molecular stabilities of TCDD and FICZ may explain the disparate results associated with these Ahr ligands. The affinity of the rapidly metabolized FICZ for Ahr is higher than that of TCDD. On the other hand, TCDD also shows a high affinity for Ahr but is not metabolized. Ahr is less sensitive to Kyn than TCDD or FICZ, which may reflect the weakly basic aromatic amine in Kyn (Fig. 3). Thus, Kyn is used experimentally at millimolar concentrations compared with nanomolar for TCDD.

The different stabilities of these ligands may be caused by different enzymatic modifications during metabolism. For instance, Mezrich *et al.* (28) found that FICZ and Kyn differently affect T<sub>reg</sub> cell differentiation and hypothesized that Kyn but not FICZ may be modified by Ahr-induced cytochrome P450 enzymes. To elucidate the intracellular mechanisms and effects of each Ahr ligand, the metabolism of each ligand should be examined in detail.

Contrary to findings from Veldhoen *et al.* (20) showing that Ahr<sup>-/-</sup> mice develop less severe EAE, Quintana *et al.* (21, 29) showed that Ahr<sup>d</sup> mice, which express a low-affinity Ahr variant caused by a mutation in the ligand-binding site, developed more severe EAE and a reduced frequency of Foxp3<sup>+</sup> Treg cells in several tissues of Ahr<sup>d</sup> mice. We recently reported that Ahr<sup>-/-</sup> mice are resistant to the development of CIA probably because of reduced T<sub>h</sub>17 cell differentiation (30). These findings indicate that a lack of Ahr and a low-affinity variant of Ahr (Ahr<sup>d</sup>) result in contrasting outcomes in various models of autoimmune diseases (20, 21, 29, 30). Ahr<sup>d</sup> mice express a 104-kDa receptor with a ligand affinity that is 10- to 100-fold

lower than that of the receptor produced by C57BL/6J mice. In a previous study, we found that the frequency of Foxp3<sup>+</sup> T<sub>reg</sub> cells generated from naive T cells in the presence of TGF- $\beta$  is mildly increased by Ahr ligands including TCDD and FICZ *in vitro* (19). On the other hand, the role of Ahr in T<sub>reg</sub> cell development is still controversial (31–33). There is a possibility that Treg cells are proportionally overrepresented in the CD4 T-cell population induced by TCDD due to minimal receptor expression and they are likely to escape death by overstimulation (32). In this case, thus, whether the absolute number or percentage of T<sub>reg</sub> cells is increased needs further consideration (32). Because the balance between T<sub>h</sub>17 and T<sub>reg</sub> cells is critical, understanding the conditions under which Ahr induces T<sub>h</sub>17 or T<sub>reg</sub> cell development during autoimmune disease development may shed light on the precise roles of Ahr. Veldhoen *et al.* (20) and Nakahama *et al.* (30) showed that Ahr deficiency in EAE and CIA disease models resulted in fewer T<sub>h</sub>17 cells and no effects on Foxp3<sup>+</sup> Treg cells, respectively. Ahr, therefore, appears to be more critical to T<sub>h</sub>17 cell development than T<sub>reg</sub> cell generation. On the other hand, Quintana *et al.* (21) identified more T<sub>h</sub>17 cells in EAE-treated Ahr<sup>d</sup> mice compared with EAE-treated wild-type (WT) mice. The authors also observed fewer Foxp3<sup>+</sup> T<sub>reg</sub> cells in thymus and mesenteric lymph node tissues isolated from naive Ahr<sup>d</sup> mice compared with WT mice, suggesting that the smaller T<sub>reg</sub> cell population in Ahr<sup>d</sup> naive mice may facilitate the differentiation of T<sub>h</sub>17 cells during disease development (29). The d allele was identified as having low affinity in the context of TCDD (34). Endogenous Ahr ligands possibly bind at low affinity to Ahr<sup>d</sup>, which likely contributes to the differences observed between Ahr<sup>d</sup> and Ahr<sup>-/-</sup> mice.

Recent studies have shown that Ahr is involved in IL-22 production from T<sub>h</sub>17 cells and  $\gamma\delta$  T cells (20, 35). IL-22 is a member of the IL-10-related cytokine family and is highly expressed by T<sub>h</sub>17 cells. IL-22<sup>-/-</sup> mice are less susceptible to CIA than WT mice, indicating that IL-22 is pro-inflammatory (36). Nakahama *et al.* (30) showed that Ahr<sup>-/-</sup> mice are resistant to CIA development owing to reduced T<sub>h</sub>17 cell differentiation. Interestingly, Ahr deficiency specifically in T cells, but not in macrophages, suppresses the development of CIA. These results suggest that the pro-inflammatory effects of Ahr in mice with CIA are mediated via T<sub>h</sub>17 cells and IL-22. IL-22 deficiency, however, enhances the development of inflammatory bowel disease in various models such as T-cell-mediated colitis and DSS-induced colitis (37). Treating mice with FICZ increases IL-22 levels and protects mice against colitis induced by trinitrobenzenesulfonic acid (TNBS), DSS or T-cell transfer, whereas

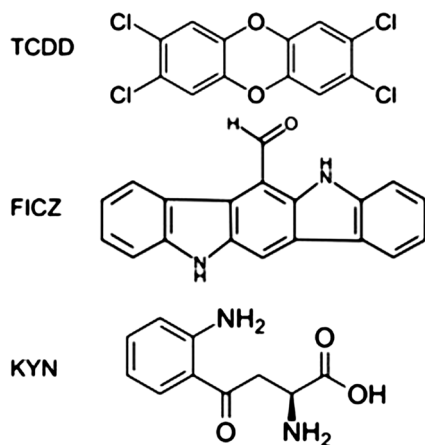**Fig. 3.** Structure of selected Ahr agonists.

administering the Ahr antagonist 2-methyl-2H-pyrazole-3-carboxylic acid decreases IL-22 levels and causes severe colitis (38). In DSS- or TNBS-induced colitis, the epithelium of the gastrointestinal tract is destroyed, leading to further inflammation. Mucosal cell types—e.g. epithelial cells—are important for maintaining homeostasis during immune responses in the gut. Examining the functions of Ahr specifically in gut epithelial cells or intraepithelial lymphocytes (IELs) and innate lymphoid cells in the gut (see below) may help to elucidate the pathogenesis of inflammatory bowel disease.

### Ahr in macrophages and inflammatory responses

Macrophages are important for innate immune responses, producing pro-inflammatory cytokines, and contribute to TLR-mediated tuning of adaptive immune responses. Kimura *et al.* (39) demonstrated that LPS-induced production of such pro-inflammatory cytokines as IL-6, TNF- $\alpha$  and IL-12 is augmented in Ahr<sup>-/-</sup> peritoneal macrophages compared with WT cells. Moreover, compared with WT mice, Ahr<sup>-/-</sup> mice are more sensitive to LPS (39, 40). Consistent with these findings, bone marrow-derived macrophages from Ahr<sup>-/-</sup> mice produce increased levels of IL-1 $\beta$  compared with WT cells (40). A recent study also demonstrated that overproduction of histamine in Ahr<sup>-/-</sup> peritoneal macrophages drives IL-6 expression (41). Of note, macrophages can be polarized into M1 or M2 cells in response to different stimuli (42). M1 macrophages produce high levels of pro-inflammatory cytokines, including IL-6, TNF- $\alpha$  and IL-12, to clear bacterial, viral and fungal infections, whereas M2 macrophages produce high levels of IL-10 in response to parasitic infections (42). Ahr is expressed in both GM-CSF-induced M1 and M-CSF-induced M2 macrophages, whereas Ahr expression is up-regulated by LPS in M1 but not M2 macrophages (our unpublished data). Altered expression of such pro-inflammatory cytokines as IL-6 in macrophages may underlie these Ahr-mediated effects.

Ahr is also involved in NF- $\kappa$ B-related signaling in stimulated macrophages. Ahr interacts with STAT1 on the IL-6 promoter, which suppresses LPS-induced activation of IL-6 expression by inhibiting the transcriptional activity of NF- $\kappa$ B (39). It is important to note that Ahr plays different roles in CpG-TLR9 and LPS-TLR4 signaling. Ahr is expressed in macrophages in response to CpG but does not regulate the production of pro-inflammatory or anti-inflammatory cytokines in these cells (39). Kimura *et al.* (39) demonstrated that LPS and CpG activate STAT1 in macrophages. Binding of Ahr and STAT1, however, has been observed in response to LPS stimulation but not CpG (39). These results suggest that Ahr does not contribute to CpG signaling in macrophages due to a lack of binding between Ahr and STAT1. LPS may induce the expression of currently unknown factors that are required for Ahr-STAT1 binding, whereas CpG does not. In addition, Gao *et al.* (43) revealed that, unlike CpG, LPS significantly induces plasminogen activator inhibitor-2 (Pai-2) expression in RAW 264.7 macrophages (22.7-fold increase in expression in response to LPS). Furthermore, Ahr cooperates with Pai-2 to regulate pro-inflammatory cytokine production in macrophages through an LPS-dependent mechanism that involves NF- $\kappa$ B but not Arnt (40). Therefore,

Pai-2 expressed in response to LPS may be one of the undefined factors that are required for Ahr-STAT1 binding. The potential role of Pai-2 in the interaction between Ahr and STAT1 during inflammatory cytokine production should be further investigated.

In humans, macrophages are affected by Ahr activation and the resulting dysregulation of vitamin catabolism. The active form of vitamin D3 regulates immune responses, and vitamin D deficiency contributes to many diseases, including the deleterious effects of cigarette smoking. Matsunawa *et al.* (44) suggested that BaP-induced vitamin D3 deficiency and Ahr activation in macrophages mediate some of the effects of smoking. Ahr activated by BaP—a polycyclic aromatic hydrocarbon—stimulates vitamin D3 catabolism to modulate vitamin D signaling. Another study of human macrophages showed that Ahr cooperates with the transcription factor cellular viral musculoaponeurotic fibrosarcoma oncogene homolog (c-maf) to control  $\beta$ 7-integrin expression in response to BaP (45).  $\beta$ 7-Integrin is a newly identified molecular target of polycyclic aromatic hydrocarbons. Increased  $\beta$ 7-integrin expression in response to these environmental contaminants most likely requires activation of cooperative pathways involving Ahr and c-maf.  $\beta$ 7-Integrin may be a homing receptor on memory and effector cells moving to lamina propria and on naive lymphocytes extravasating in the gut (46). Therefore, changes in  $\beta$ 7-integrin expression in response to polycyclic aromatic hydrocarbons and the downstream Ahr-c-maf interaction may alter immune responses in the gut. In summary, Ahr regulates the inflammatory responses of macrophages by interacting with STAT1, Pai-2 or c-maf.

TLR activation in macrophages and T-cell responses in the CIA model appear to elicit contradictory Ahr activities (30, 39). Ahr may interact with other factors—e.g. interferon regulatory factor 4 (IRF4)—to affect the function and differentiation of T cells and macrophages. IRF4 plays crucial roles in T<sub>h</sub>17 cell and macrophage differentiation. IRF4 is thought to positively regulate the development of several T-cell subsets, including T<sub>h</sub>17 cells (47). In T<sub>h</sub>17 cells, IRF4 deficiency reduces the expression of ROR $\gamma$ t and ROR $\alpha$ , both of which are important for T<sub>h</sub>17 cell differentiation (48). IRF4-deficient mice do not develop EAE, and T<sub>h</sub> cells from these mice fail to differentiate into T<sub>h</sub>17 cells (48). On the other hand, in macrophages, IRF4 negatively regulates TLR signaling and the production of the pro-inflammatory cytokines TNF- $\alpha$  and IL-12 in response to LPS (49, 50). Additionally, IRF4 interacts with Jumonji domain-containing protein 3 to control M2 macrophage polarization (51). IRF4 has at least two distinct functions in T cells and macrophages, either promoting pro-inflammatory effects via enhanced T<sub>h</sub>17 cell development or increasing anti-inflammatory effects by inhibition of pro-inflammatory cytokine production in macrophages or polarizing M2 macrophages. The promoter of IRF4 contains two AHR binding sites. Therefore, Ahr may bind to IRF4 in T cells or macrophages and regulate the function of these cells by affecting T<sub>h</sub>17 cell differentiation or macrophage polarization, respectively. An interaction between Ahr and IRF4 may underlie the different regulatory roles of Ahr in T cells and macrophages and in experimental models of inflammatory diseases, such as CIA or endotoxin shock.

### Ahr in DCs and anti-inflammatory effects

DCs play key roles in antigen presentation and the initiation of T-cell responses. These antigen-presenting cells can be divided into various subsets based on the expression profiles of phenotypic markers (52). Naive T-cell activation, proliferation and differentiation are induced by DCs and associated inflammatory cytokines. TCDD can induce Ahr expression and activation in DCs to enhance DC differentiation (53). In addition to TCDD, the TLR ligands LPS and CpG induce Ahr expression in bone marrow-derived DCs (BMDCs) (54). In response to LPS or CpG, WT and Ahr<sup>-/-</sup> BMDCs show similar IL-6 and TNF- $\alpha$  production, whereas IL-10 levels are significantly reduced in Ahr<sup>-/-</sup> BMDCs (54). In Ahr<sup>-/-</sup> mice, RelB, a regulator of NF- $\kappa$ B signaling, is rapidly degraded, which may reduce IL-10 production in Ahr<sup>-/-</sup> BMDCs (55, 56).

In addition, as yet unidentified factors likely underlie the discrepant results related to Ahr, such as cellular responses to TCDD, FICZ, ITE and tryptophan metabolites. Depending on the ligand, Ahr regulates Foxp3<sup>+</sup> Treg and T<sub>h</sub>17 cells, resulting in different effects in various experimental disease models. In BMDCs, TCDD and FICZ induce the same phenotypic changes (57). Recently, Wu *et al.* (58) showed that a lack of Ahr reduces the expression of LPS-induced inflammatory genes, including *CYP1A1*, *COX-2*, *CEBP $\beta$*  and *IDO* in BMDCs. *IDO* encodes indoleamine 2,3-dioxygenase, an enzyme that degrades tryptophan into other metabolites (59). The alternative NF- $\kappa$ B pathway is also linked to the induction of *IDO* expression in DCs. Kyn—a first-round product of *IDO*-mediated tryptophan degradation—enhances T<sub>reg</sub> cell development and inhibits IL-17 production from T<sub>h</sub>17 cells (28, 60). Consistent with these results, Vogel *et al.* (53) demonstrated that the spleens of TCDD-treated mice show increased and decreased levels of the T<sub>reg</sub> cell marker Foxp3 in response to induction and inhibition of *IDO* activity, respectively.

Taken together, these data suggest that Ahr deletion or activation alters the functions of BMDCs in response to various stimuli. Ahr plays important roles in DCs and regulates immune responses to promote or suppress the development of certain experimental and inflammatory diseases, whereas the profiles and effects of Ahr expression and activation in various DC subsets, including myeloid DCs and plasmacytoid DCs, are currently unclear. The regulatory roles of Ahr in the range of DC subsets should be further investigated.

### Ahr activation and immunosuppression in B cells

B cells—key components of humoral immunity—are sensitive to such toxic compounds as TCDD. Ahr is an important mediator of the effects of TCDD on B cells (61). TCDD induces Ahr expression and results in LPS-induced inhibition of IgM secretion in the CH12.LX B-cell line (62). Changes in B-cell differentiation and antibody production may depend on BTB and CNC homology 2 (Bach2), a direct target of Ahr (63).

TCDD-mediated suppression of B-cell differentiation into plasma cells involves several transcription factors, including

PR domain zinc finger protein 1 (Prdm1), B-cell lymphoma 6 (Bcl6) and paired box protein 5 (Pax5) (64). Bach2 expression in response to TCDD–Ahr binding or antigen activation inhibits Prdm1 and regulates the suppressive effects of Bcl6 and Pax5 (63). In addition, Tanaka *et al.* (65) found that IL-4 causes Ahr expression and activation in B cells. Ahr, however, is not involved in IgE synthesis by B cells (65), and the regulation of immunoglobulin synthesis requires further investigation. Suppressor of cytokine signaling 2 is dose dependently expressed in response to TCDD in murine B cells (66).

A lack of Ahr also affects the maturation of B cells from bone marrow. Thurmond *et al.* (67) demonstrated that Ahr<sup>-/-</sup> mice have more pro-/pre-B cells than Ahr<sup>+/+</sup> mice and TCDD reduces the number of pro-/pre-B cells in Ahr<sup>+/+</sup> mice. Interestingly, Ahr affects B cells only during early developmental stages. The precise mechanism by which the Ahr regulates the number of early pro-/pre-B and immature B cells is unclear (67). TCDD also impairs the effector functions of primary human B cells and suppresses IgM responses in most donors (68). TCDD activates the Ahr in B cells and impairs B-cell differentiation and IgM production.

We have summarized studies of interactions between Ahr and other downstream molecules in different cell types in Table 2.

### Ahr in other cell types

#### Skin cells

Ahr is expressed in Langerhans cells, a DC subset that serves as antigen-presenting cells in the epidermis. Ahr<sup>-/-</sup> Langerhans cells do not mature or function properly, which may contribute to skin allergies (69). The lack of Ahr prevents the development of invariant epidermal GM-CSF-producing  $\gamma\delta$  T cells in the skin of mice, which may affect Langerhans cell maturation owing to reduced GM-CSF levels (70). Furthermore, Ikuta *et al.* (71) demonstrated that Ahr co-localizes with the transcriptional repressor B lymphocyte maturation protein 1, which is expressed from an Ahr target gene in epidermal keratinocytes and sebocytes. In normal human epidermal keratinocytes, the antifungal agent ketoconazole activates NF erythroid 2-related factor-2 (Nrf2) via AhR signaling (72). The AhR–Nrf2 pathway may provide a foundation for therapies for inflammatory skin diseases.

#### Neuroinflammatory and brain tumor cells

Platten *et al.* (73) suggested treating autoimmune neuroinflammation with the synthetic tryptophan metabolite *N*-(3,4-dimethoxycinnamoyl) anthranilic acid (3,4-DAA). Although many Ahr ligands are toxic and cannot be used therapeutically, 3,4-DAA is an orally active compound with favorable pharmacokinetics in humans. Established EAE in mice is ameliorated by 3,4-DAA (73). Recently, Opitz *et al.* (74) demonstrated that Kyn is also an endogenous Ahr ligand in humans. Generated by human brain tumor cells via tryptophan-2,3-dioxygenase (TDO), Kyn suppresses antitumor immune responses (74). Mechanistically, tumors can escape immune responses by expressing *IDO* or *TDO* and locally

**Table 2.** Molecules that interact/bind with Ahr and downstream effects

| Molecules that interact/bind with Ahr | Cell type   | Effects                                                                       | References |
|---------------------------------------|-------------|-------------------------------------------------------------------------------|------------|
| Stat1, Stat5                          | T cells     | Reverses suppression of T <sub>h</sub> 17 cell development                    | 19, 20     |
| IL-17 promoter                        | T cells     | Promotes IL-17 production                                                     | 25         |
| Stat1/IL-6 promoter                   | Macrophages | Suppresses LPS-induced IL-6 production by inhibiting NF- $\kappa$ B signaling | 39         |
| Pai-2                                 | Macrophages | Regulates LPS-induced pro-inflammatory cytokine production via NF- $\kappa$ B | 40         |
| Sp1/histidine decarboxylase promoter  | Macrophages | Inhibits LPS-induced histamine production                                     | 41         |
| BaP/c-maf                             | Macrophages | Increases $\beta$ -integrin expression                                        | 45         |
| Bach2                                 | B cells     | Inhibits B-cell differentiation                                               | 63         |

depleting tryptophan, which has led to studies of IDO and TDO inhibitors as antitumor therapies (75, 76).

#### Cells in the gut

Lee *et al.* (77) found that innate lymphoid cells secrete IL-22 to protect the intestinal mucosa from infection. Decreased levels of IL-22 in Ahr<sup>-/-</sup> mice are caused by markedly reduced numbers of innate lymphoid cells, including the NKp46<sup>+</sup> and LTI-like subsets (77, 78). These observations may relate to Notch signaling, an important downstream pathway of Ahr in the generation of NKp46<sup>+</sup> innate lymphoid cells (77, 78). Moreover, innate lymphoid cells expressing the nuclear receptor ROR $\gamma$ t contribute to gut immunity, possibly because of the need for IL-22 (79). Ahr promotes gut immunity by regulating the function of ROR $\gamma$ t<sup>+</sup> innate lymphoid cells (79). Additionally, IELs play important roles in intestinal immunity. Li *et al.* (80) reported that Ahr helps maintain the IEL population; Ahr deficiency reduced the number of IELs, increased the bacterial burden and promoted DSS-induced colitis (80). Each of these results supports a modulatory role for Ahr in immune responses in the gut.

#### Bone marrow and stem cells

Sakai *et al.* (81) found a defect in the long-term reconstitution activity of TCDD-treated hematopoietic stem cells (HSCs) but not in Ahr<sup>-/-</sup> HSCs. TCDD increased the number and damaged the stem cell functions of CD34<sup>+</sup>-KSL (CD34<sup>+</sup>, c-kit<sup>+</sup>, Sca-1<sup>+</sup>, lineage-negative) cells, whereas an absence of Ahr prevented effects on the stem cell activity of these cells (81). In this study, the authors hypothesized that TCDD affected the expression of several intrinsic factors that control HSC self-renewal and/or reconstitution activities (81). In particular, HOXB4 seems to play an important role because an upstream region of the HOXB4 gene contains two XREs that may interact with TCDD-bound Ahr/Arnt (81). Therefore, Ahr/Arnt may inhibit HOXB4 expression in HSCs (81). Additionally, Boitano *et al.* (82) discovered the purine derivative StemRegenin 1 (SR1), which promotes *ex vivo* expansion of CD34<sup>+</sup> cells from primary human HSCs. Interestingly, SR1 is an Ahr antagonist and SR1-induced CD34<sup>+</sup> cell proliferation is mediated through direct binding to Ahr (82). Although the molecular mechanisms underlying the effects of Ahr in HSCs have not been detailed, using SR1 to antagonize the activity of Ahr may improve

clinical approaches to HSC-based therapies (82). Recently, Korkalainen *et al.* (83) reported that activating Ahr with a low dose of TCDD (10 fM) affected osteoblast and osteoclast differentiation from bone marrow-derived stem cells. TCDD significantly reduces mRNA levels of various factors involved in osteoblast differentiation, including RUNX2, alkaline phosphatase and osteocalcin, and decreases the number of F-actin rings and TRACP<sup>+</sup> multinucleated cells, both of which are markers of osteoclast differentiation. These results suggest that Ahr contributes to bone quality in animals exposed to TCDD. Bone marrow stromal cells (BMSCs) regulate the growth and development of hematopoietic cell lineages. LPS-stimulated BMSCs produce cytokines, including IL-6 and GM-CSF. Interestingly, TCDD specifically suppresses LPS-induced IL-6 production in BMSCs, suggesting that Ahr agonists regulate BMSCs to trigger inflammatory responses to antigens (84). Ahr activation in hematopoietic stem/progenitor cells affects cellular trafficking and migration (85, 86). Tables 1 and 3 provide a summary of studies examining Ahr-mediated effects in various cells and tissues, and the potential functions of Ahr in several autoimmune disease models.

#### Conclusion

In summary, a number of studies have provided valuable insights into the roles of Ahr in immune responses, including regulating transcription factors, cellular proteins and responses to chemical compounds via the Ahr-Arnt, NF- $\kappa$ B and p38-MAPK signaling pathways. Immune cell-specific conditional knockout mice have been used to examine Ahr in various immune cell types, including macrophages and T cells. Ahr is an anti-inflammatory factor in macrophages, whereas it is likely pro-inflammatory in T cells. Studies of mice bearing specific deletions of Ahr in DCs, B cells or epithelial cells will likely provide additional insights. Furthermore, the ligands of Ahr activate multiple signal transduction pathways. Elucidating the mechanisms by which Ahr regulates immune responses will provide a foundation for therapeutically targeting this molecule in a range of autoimmune and inflammatory diseases.

#### Funding

Program for the Promotion of Fundamental Studies in Health Sciences from the National Institute of Biomedical Innovation; Grant-in-Aid for Scientific Research (KAKENHI) 24790471 (to N.T.N.) from the Japan Society for the Promotion of Science.

**Table 3.** Ahr-mediated effects in various cells and tissues

| Cells/tissues | Ahr-mediated effects                                                                                                          | References |
|---------------|-------------------------------------------------------------------------------------------------------------------------------|------------|
| T cells       | IL-6 and TGF- $\beta$ induce Ahr expression                                                                                   | 19         |
|               | Ahr deficiency decreases the number of T <sub>h</sub> 17 cells                                                                |            |
|               | TCDD and FICZ promote the development of T <sub>h</sub> 17 and T <sub>reg</sub> cells                                         |            |
|               | Ahr and Kyn induce T <sub>reg</sub> cell generation                                                                           | 28         |
| Macrophages   | FICZ increases IL-22 production                                                                                               | 38         |
|               | Ahr deficiency enhances LPS-induced IL-1 $\beta$ production and LPS-induced IL-6, IL-12 and TNF- $\alpha$ expression          | 39, 40     |
|               | Ahr signaling decreases LPS-induced histamine production                                                                      | 41         |
|               | BaP increases vitamin D3 catabolism                                                                                           | 44, 45     |
| DCs           | BaP and c-maf increase $\beta$ -integrin expression                                                                           |            |
|               | Ahr deficiency inhibits DC induction of T <sub>reg</sub> cell differentiation and enhances T <sub>h</sub> 17 cell development | 54         |
|               | Kyn decreases DC-mediated immunogenicity                                                                                      |            |
|               | Ahr deficiency does not affect LPS-induced IL-6 and TNF- $\alpha$ expression but inhibits IL-10 production                    |            |
| B cells       | Ahr deficiency decreases LPS-induced inflammatory gene expression.                                                            | 58         |
|               | Ahr deficiency affects early B-cell development                                                                               | 67         |
|               | TCCD suppresses the differentiation of B-cell-derived plasma cells.                                                           | 68         |
|               | TCCD enhances LPS-induced IgM secretion                                                                                       |            |
| Skin          | Ahr deficiency leads to functional defects in Langerhans cells and some $\gamma\delta$ T cells                                | 69, 70     |
| Gut           | Ahr deficiency reduces the numbers of innate lymphoid cells and intestinal epithelial lymphocytes                             | 77–80      |
| Bone          | Ahr activation inhibits osteoblast and osteoclast differentiation                                                             | 83         |
|               | TCDD suppresses LPS-induced IL-6 expression from stromal cells                                                                | 84         |

## References

- Perdew, G. H. 1988. Association of the Ah receptor with the 90-kDa heat shock protein. *J. Biol. Chem.* 263:13802.
- Kazlauskas, A., Poellinger, L. and Pongratz, I. 1999. Evidence that the co-chaperone p23 regulates ligand responsiveness of the dioxin (aryl hydrocarbon) receptor. *J. Biol. Chem.* 274:13519.
- Ma, Q. and Whitlock, J. P., Jr. 1997. A novel cytoplasmic protein that interacts with the Ah receptor, contains tetratricopeptide repeat motifs, and augments the transcriptional response to 2,3,7,8-tetrachlorodibenzo-*p*-dioxin. *J. Biol. Chem.* 272:8878.
- Sogawa, K. and Fujii-Kuriyama, Y. 1997. Ah receptor, a novel ligand-activated transcription factor. *J. Biochem.* 122:1075.
- Burbach, K. M., Poland, A. and Bradfield, C. A. 1992. Cloning of the Ah-receptor cDNA reveals a distinctive ligand-activated transcription factor. *Proc. Natl Acad. Sci. USA* 89:8185.
- Schrenk, D. 1998. Impact of dioxin-type induction of drug-metabolizing enzymes on the metabolism of endo- and xenobiotics. *Biochem. Pharmacol.* 55:1155.
- Tomita, S., Jiang, H. B., Ueno, T. *et al.* 2003. T cell-specific disruption of arylhydrocarbon receptor nuclear translocator (Arnt) gene causes resistance to 2,3,7,8-tetrachlorodibenzo-*p*-dioxin-induced thymic involution. *J. Immunol.* 171:4113.
- Mimura, J., Ema, M., Sogawa, K. and Fujii-Kuriyama, Y. 1999. Identification of a novel mechanism of regulation of Ah (dioxin) receptor function. *Genes Dev.* 13:20.
- Sun, Y. V., Boverhof, D. R., Burgoon, L. D., Fielden, M. R. and Zacharewski, T. R. 2004. Comparative analysis of dioxin response elements in human, mouse and rat genomic sequences. *Nucleic Acids Res.* 32:4512.
- Ohtake, F., Baba, A., Takada, I. *et al.* 2007. Dioxin receptor is a ligand-dependent E3 ubiquitin ligase. *Nature* 446:562.
- Ohtake, F., Fujii-Kuriyama, Y. and Kato, S. 2009. AhR acts as an E3 ubiquitin ligase to modulate steroid receptor functions. *Biochem. Pharmacol.* 77:474.
- Mimura, J. and Fujii-Kuriyama, Y. 2003. Functional role of AhR in the expression of toxic effects by TCDD. *Biochim. Biophys. Acta* 1619:263.
- Baba, T., Mimura, J., Nakamura, N. *et al.* 2005. Intrinsic function of the aryl hydrocarbon (dioxin) receptor as a key factor in female reproduction. *Mol. Cell Biol.* 25:10040.
- Weiss, C., Faust, D., Dürk, H. *et al.* 2005. TCDD induces c-jun expression via a novel Ah (dioxin) receptor-mediated p38-MAPK-dependent pathway. *Oncogene* 24:4975.
- Nguyen, L. P. and Bradfield, C. A. 2008. The search for endogenous activators of the aryl hydrocarbon receptor. *Chem. Res. Toxicol.* 21:102.
- DiNatale, B. C., Murray, I. A., Schroeder, J. C. *et al.* 2010. Kynurenic acid is a potent endogenous aryl hydrocarbon receptor ligand that synergistically induces interleukin-6 in the presence of inflammatory signaling. *Toxicol. Sci.* 115:89.
- Kerkvliet, N. I. 2012. TCDD: an environmental immunotoxicant reveals a novel pathway of immunoregulation—a 30-year odyssey. *Toxicol. Pathol.* 40:138.
- Opitz, C. A., Wick, W., Steinman, L. and Platten, M. 2007. Tryptophan degradation in autoimmune diseases. *Cell Mol. Life Sci.* 64:2542.
- Kimura, A., Naka, T., Nohara, K., Fujii-Kuriyama, Y. and Kishimoto, T. 2008. Aryl hydrocarbon receptor regulates Stat1 activation and participates in the development of Th17 cells. *Proc. Natl Acad. Sci. USA* 105:9721.
- Veldhoen, M., Hirota, K., Westendorf, A. M. *et al.* 2008. The aryl hydrocarbon receptor links Th17-cell-mediated autoimmunity to environmental toxins. *Nature* 453:106.
- Quintana, F. J., Basso, A. S., Iglesias, A. H. *et al.* 2008. Control of T(reg) and T(H)17 cell differentiation by the aryl hydrocarbon receptor. *Nature* 453:65.
- Kimura, A. and Kishimoto, T. 2010. IL-6: regulator of Treg/Th17 balance. *Eur. J. Immunol.* 40:1830.
- Kishimoto, T. 2010. IL-6: from its discovery to clinical applications. *Int. Immunol.* 22:347.
- Korn, T., Bettelli, E., Oukka, M. and Kuchroo, V. K. 2009. IL-17 and Th17 cells. *Annu. Rev. Immunol.* 27:485.
- Cui, G., Qin, X., Wu, L. *et al.* 2011. Liver X receptor (LXR) mediates negative regulation of mouse and human Th17 differentiation. *J. Clin. Invest.* 121:658.
- Veldhoen, M., Hirota, K., Christensen, J., O'Garra, A. and Stockinger, B. 2009. Natural agonists for aryl hydrocarbon receptor in culture medium are essential for optimal differentiation of Th17 T cells. *J. Exp. Med.* 206:43.
- Apetoh, L., Quintana, F. J., Pot, C. *et al.* 2010. The aryl hydrocarbon receptor interacts with c-Maf to promote the differentiation of type 1 regulatory T cells induced by IL-27. *Nat. Immunol.* 11:854.

- 28 Mezrich, J. D., Fechner, J. H., Zhang, X., Johnson, B. P., Burlingham, W. J. and Bradfield, C. A. 2010. An interaction between kynurenine and the aryl hydrocarbon receptor can generate regulatory T cells. *J. Immunol.* 185:3190.
- 29 Quintana, F. J., Murugaiyan, G., Farez, M. F. *et al.* 2010. An endogenous aryl hydrocarbon receptor ligand acts on dendritic cells and T cells to suppress experimental autoimmune encephalomyelitis. *Proc. Natl Acad. Sci. USA* 107:20768.
- 30 Nakahama, T., Kimura, A., Nguyen, N. T. *et al.* 2011. Aryl hydrocarbon receptor deficiency in T cells suppresses the development of collagen-induced arthritis. *Proc. Natl Acad. Sci. USA* 108:14222.
- 31 Jäger, A. and Kuchroo, V. K. 2010. Effector and regulatory T-cell subsets in autoimmunity and tissue inflammation. *Scand. J. Immunol.* 72:173.
- 32 Stockinger, B. 2009. Beyond toxicity: aryl hydrocarbon receptor-mediated functions in the immune system. *J. Biol.* 8:61.
- 33 Stevens, E. A., Mezrich, J. D. and Bradfield, C. A. 2009. The aryl hydrocarbon receptor: a perspective on potential roles in the immune system. *Immunology* 127:299.
- 34 Moriguchi, T., Motohashi, H., Hosoya, T. *et al.* 2003. Distinct response to dioxin in an arylhydrocarbon receptor (AHR)-humanized mouse. *Proc. Natl Acad. Sci. USA* 100:5652.
- 35 Martin, B., Hirota, K., Cua, D. J., Stockinger, B. and Veldhoen, M. 2009. Interleukin-17-producing gammadelta T cells selectively expand in response to pathogen products and environmental signals. *Immunity* 31:321.
- 36 Geboes, L., Dumoutier, L., Kelchtermans, H. *et al.* 2009. Proinflammatory role of the Th17 cytokine interleukin-22 in collagen-induced arthritis in C57BL/6 mice. *Arthritis Rheum.* 60:390.
- 37 Zenewicz, L. A., Yancopoulos, G. D., Valenzuela, D. M., Murphy, A. J., Stevens, S. and Flavell, R. A. 2008. Innate and adaptive interleukin-22 protects mice from inflammatory bowel disease. *Immunity* 29:947.
- 38 Monteleone, I., Rizzo, A., Sarra, M. *et al.* 2011. Aryl hydrocarbon receptor-induced signals up-regulate IL-22 production and inhibit inflammation in the gastrointestinal tract. *Gastroenterology* 141:237.
- 39 Kimura, A., Naka, T., Nakahama, T. *et al.* 2009. Aryl hydrocarbon receptor in combination with Stat1 regulates LPS-induced inflammatory responses. *J. Exp. Med.* 206:2027.
- 40 Sekine, H., Mimura, J., Oshima, M. *et al.* 2009. Hypersensitivity of aryl hydrocarbon receptor-deficient mice to lipopolysaccharide-induced septic shock. *Mol. Cell Biol.* 29:6391.
- 41 Masuda, K., Kimura, A., Hanieh, H. *et al.* 2011. Aryl hydrocarbon receptor negatively regulates LPS-induced IL-6 production through suppression of histamine production in macrophages. *Int. Immunol.* 23:637.
- 42 Biswas, S. K. and Mantovani, A. 2010. Macrophage plasticity and interaction with lymphocyte subsets: cancer as a paradigm. *Nat. Immunol.* 11:889.
- 43 Gao, J. J., Diesl, V., Wittmann, T. *et al.* 2002. Regulation of gene expression in mouse macrophages stimulated with bacterial CpG-DNA and lipopolysaccharide. *J. Leukoc. Biol.* 72:1234.
- 44 Matsunawa, M., Amano, Y., Endo, K. *et al.* 2009. The aryl hydrocarbon receptor activator benzo[a]pyrene enhances vitamin D3 catabolism in macrophages. *Toxicol. Sci.* 109:50.
- 45 Monteiro, P., Gilot, D., Le Ferrec, E. *et al.* 2007. AhR- and c-maf-dependent induction of beta7-integrin expression in human macrophages in response to environmental polycyclic aromatic hydrocarbons. *Biochem. Biophys. Res. Commun.* 358:442.
- 46 Farstad, I. N., Halstensen, T. S., Lien, B. *et al.* 1996. Distribution of beta 7 integrins in human intestinal mucosa and organized gut-associated lymphoid tissue. *Immunology* 89:227.
- 47 Veldhoen, M. 2010. Interferon regulatory factor 4: combinational control of lymphocyte differentiation. *Immunity* 33:141.
- 48 Brüstle, A., Heink, S., Huber, M. *et al.* 2007. The development of inflammatory T(H)-17 cells requires interferon-regulatory factor 4. *Nat. Immunol.* 8:958.
- 49 Honma, K., Udono, H., Kohno, T. *et al.* 2005. Interferon regulatory factor 4 negatively regulates the production of proinflammatory cytokines by macrophages in response to LPS. *Proc. Natl Acad. Sci. USA* 102:16001.
- 50 Negishi, H., Ohba, Y., Yanai, H. *et al.* 2005. Negative regulation of Toll-like-receptor signaling by IRF-4. *Proc. Natl Acad. Sci. USA* 102:15989.
- 51 Satoh, T., Takeuchi, O., Vandenberg, A. *et al.* 2010. The Jmjd3-Irf4 axis regulates M2 macrophage polarization and host responses against helminth infection. *Nat. Immunol.* 11:936.
- 52 Belz, G. T. and Nutt, S. L. 2012. Transcriptional programming of the dendritic cell network. *Nat. Rev. Immunol.* 12:101.
- 53 Vogel, C. F., Goth, S. R., Dong, B., Pessah, I. N. and Matsumura, F. 2008. Aryl hydrocarbon receptor signaling mediates expression of indoleamine 2,3-dioxygenase. *Biochem. Biophys. Res. Commun.* 375:331.
- 54 Nguyen, N. T., Kimura, A., Nakahama, T. *et al.* 2010. Aryl hydrocarbon receptor negatively regulates dendritic cell immunogenicity via a kynurenine-dependent mechanism. *Proc. Natl Acad. Sci. USA* 107:19961.
- 55 Thatcher, T. H., Maggior, S. B., Bagloli, C. J. *et al.* 2007. Aryl hydrocarbon receptor-deficient mice develop heightened inflammatory responses to cigarette smoke and endotoxin associated with rapid loss of the nuclear factor-kappaB component RelB. *Am. J. Pathol.* 170:855.
- 56 Kerkvliet, N. I. 2009. AHR-mediated immunomodulation: the role of altered gene transcription. *Biochem. Pharmacol.* 77:746.
- 57 Bankoti, J., Rase, B., Simones, T. and Shepherd, D. M. 2010. Functional and phenotypic effects of AhR activation in inflammatory dendritic cells. *Toxicol. Appl. Pharmacol.* 246:18.
- 58 Wu, D., Li, W., Lok, P., Matsumura, F. and Vogel, C. F. 2011. AhR deficiency impairs expression of LPS-induced inflammatory genes in mice. *Biochem. Biophys. Res. Commun.* 410:358.
- 59 Mellor, A. L. and Munn, D. H. 2004. IDO expression by dendritic cells: tolerance and tryptophan catabolism. *Nat. Rev. Immunol.* 4:762.
- 60 Desvignes, L. and Ernst, J. D. 2009. Interferon-gamma-responsive nonhematopoietic cells regulate the immune response to Mycobacterium tuberculosis. *Immunity* 31:974.
- 61 Sulentic, C. E. and Kaminski, N. E. 2011. The long winding road toward understanding the molecular mechanisms for B-cell suppression by 2,3,7,8-tetrachlorodibenzo-*p*-dioxin. *Toxicol. Sci.* 120(Suppl. 1):S171.
- 62 Sulentic, C. E., Holsapple, M. P. and Kaminski, N. E. 1998. Aryl hydrocarbon receptor-dependent suppression by 2,3,7, 8-tetrachlorodibenzo-*p*-dioxin of IgM secretion in activated B cells. *Mol. Pharmacol.* 53:623.
- 63 De Abrew, K. N., Phadnis, A. S., Crawford, R. B., Kaminski, N. E. and Thomas, R. S. 2011. Regulation of Bach2 by the aryl hydrocarbon receptor as a mechanism for suppression of B-cell differentiation by 2,3,7,8-tetrachlorodibenzo-*p*-dioxin. *Toxicol. Appl. Pharmacol.* 252:150.
- 64 De Abrew, K. N., Kaminski, N. E. and Thomas, R. S. 2010. An integrated genomic analysis of aryl hydrocarbon receptor-mediated inhibition of B-cell differentiation. *Toxicol. Sci.* 118:454.
- 65 Tanaka, G., Kanaji, S., Hirano, A. *et al.* 2005. Induction and activation of the aryl hydrocarbon receptor by IL-4 in B cells. *Int. Immunol.* 17:797.
- 66 Boverhof, D. R., Tam, E., Harney, A. S., Crawford, R. B., Kaminski, N. E. and Zacharewski, T. R. 2004. 2,3,7,8-Tetrachlorodibenzo-*p*-dioxin induces suppressor of cytokine signaling 2 in murine B cells. *Mol. Pharmacol.* 66:1662.
- 67 Thurmond, T. S., Staples, J. E., Silverstone, A. E. and Gasiewicz, T. A. 2000. The aryl hydrocarbon receptor has a role in the *in vivo* maturation of murine bone marrow B lymphocytes and their response to 2,3,7,8-tetrachlorodibenzo-*p*-dioxin. *Toxicol. Appl. Pharmacol.* 165:227.
- 68 Lu, H., Crawford, R. B., Suarez-Martinez, J. E., Kaplan, B. L. and Kaminski, N. E. 2010. Induction of the aryl hydrocarbon receptor-responsive genes and modulation of the immunoglobulin M response by 2,3,7,8-tetrachlorodibenzo-*p*-dioxin in primary human B cells. *Toxicol. Sci.* 118:86.
- 69 Jux, B., Kadow, S. and Esser, C. 2009. Langerhans cell maturation and contact hypersensitivity are impaired in aryl hydrocarbon receptor-null mice. *J. Immunol.* 182:6709.



- 70 Kadow, S., Jux, B., Zahner, S. P. *et al.* 2011. Aryl hydrocarbon receptor is critical for homeostasis of invariant gamma delta T cells in the murine epidermis. *J. Immunol.* 187:3104.
- 71 Ikuta, T., Ohba, M., Zouboulis, C. C., Fujii-Kuriyama, Y. and Kawajiri, K. 2010. B lymphocyte-induced maturation protein 1 is a novel target gene of aryl hydrocarbon receptor. *J. Dermatol. Sci.* 58:211.
- 72 Tsuji, G., Takahara, M., Uchi, H. *et al.* 2012. Identification of ketoconazole as an AhR-Nrf2 activator in cultured human keratinocytes: the basis of its anti-inflammatory effect. *J. Invest. Dermatol.* 132:59.
- 73 Platten, M., Ho, P. P., Youssef, S. *et al.* 2005. Treatment of autoimmune neuroinflammation with a synthetic tryptophan metabolite. *Science* 310:850.
- 74 Opitz, C. A., Litzemberger, U. M., Sahm, F. *et al.* 2011. An endogenous tumour-promoting ligand of the human aryl hydrocarbon receptor. *Nature* 478:197.
- 75 Dolusić, E., Larrieu, P., Moineaux, L. *et al.* 2011. Tryptophan 2,3-dioxygenase (TDO) inhibitors. 3-(2-(pyridyl)ethenyl)indoles as potential anticancer immunomodulators. *J. Med. Chem.* 54:5320.
- 76 Röhrig, U. F., Awad, L., Grosdidier, A. *et al.* 2010. Rational design of indoleamine 2,3-dioxygenase inhibitors. *J. Med. Chem.* 53:1172.
- 77 Lee, J. S., Cella, M., McDonald, K. G. *et al.* 2012. AHR drives the development of gut ILC22 cells and postnatal lymphoid tissues via pathways dependent on and independent of Notch. *Nat. Immunol.* 13:144.
- 78 Lee, J. S., Cella, M. and Colonna, M. 2012. AHR and the transcriptional regulation of type-17/22 ILC. *Front. Immunol.* 3:10.
- 79 Qiu, J., Heller, J. J., Guo, X. *et al.* 2012. The aryl hydrocarbon receptor regulates gut immunity through modulation of innate lymphoid cells. *Immunity* 36:92.
- 80 Li, Y., Innocenti, S., Withers, D. R. *et al.* 2011. Exogenous stimuli maintain intraepithelial lymphocytes via aryl hydrocarbon receptor activation. *Cell* 147:629.
- 81 Sakai, R., Kajiume, T., Inoue, H. *et al.* 2003. TCDD treatment eliminates the long-term reconstitution activity of hematopoietic stem cells. *Toxicol. Sci.* 72:84.
- 82 Boitano, A. E., Wang, J., Romeo, R. *et al.* 2010. Aryl hydrocarbon receptor antagonists promote the expansion of human hematopoietic stem cells. *Science* 329:1345.
- 83 Korkalainen, M., Kallio, E., Olkku, A. *et al.* 2009. Dioxins interfere with differentiation of osteoblasts and osteoclasts. *Bone* 44:1134.
- 84 Jensen, B. A., Leeman, R. J., Schlezinger, J. J. and Sherr, D. H. 2003. Aryl hydrocarbon receptor (AhR) agonists suppress interleukin-6 expression by bone marrow stromal cells: an immunotoxicology study. *Environ. Health* 2:16.
- 85 Singh, K. P., Garrett, R. W., Casado, F. L. and Gasiewicz, T. A. 2011. Aryl hydrocarbon receptor-null allele mice have hematopoietic stem/progenitor cells with abnormal characteristics and functions. *Stem Cells Dev.* 20:769.
- 86 Casado, F. L., Singh, K. P. and Gasiewicz, T. A. 2011. Aryl hydrocarbon receptor activation in hematopoietic stem/progenitor cells alters cell function and pathway-specific gene modulation reflecting changes in cellular trafficking and migration. *Mol. Pharmacol.* 80:673.
